# Supplementary material for: Mitigating Antimicrobial Resistance by Innovative Solutions in AI (MARISA): a modified James Lind Alliance Analysis
Source: Research Square preprint supplement (doi:10.21203/rs.3.rs-6757228/v1), 2025-06-06
Supplement: Supplementary file 1 [file a3de57a4eae105d79d61fa8c.pdf]

# Mitigating Anti-microbial Resistance by Innovative Solutions in AI (MARISA)

Hutan Ashrafian  
Lead for AI and Big Data, IGHI  
hutan@ic.ac.uk

# Global Risk

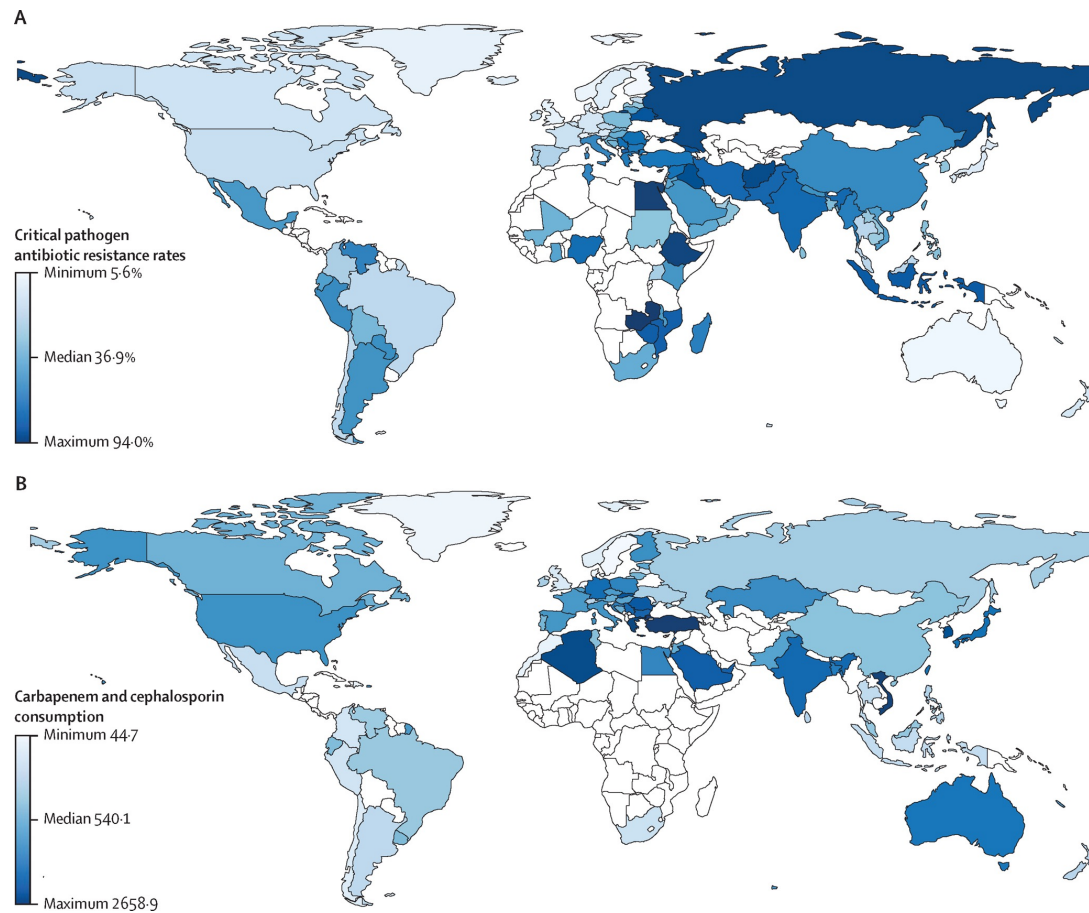

# Consensus Priority Settings

## Phase I

- Objective: Gather uncertainties (questions insufficiently addressed by current research)
- Method: Survey World Experts and identify supporting literature

## Phase II

- Objective: Develop a short list of uncertainties
- Method: Interim prioritization survey of stakeholders

## Phase III

- Objective: Arrive at a top list of research priorities
- Method: Remote/Email prioritisation process

# Evidence Gaps and Uncertainties in AMR

- (i) Antibiotic/Drug Design
- (ii) Novel/non-classical-drug solutions, eg biologics and other technologies
- (iii) Combination solutions
- (iv) Biomarker design (population)
- (v) POC tests
- (vi) Antibiotic/Drug re-purposing
- (vii) Precision medicine/individual prediction
- (viii) Population prediction/identification of high-risk individuals (genomics/EHR)
- (ix) Behavioural modification
- (x) AMR Surveillance/epidemic surveillance
- (xi) Economic Resource allocation
- (xii) Health policy development
- (xiii) Big Data Analytics and Real World Evidence
- (xiv) Communication of AMR
